# Supplementary material
Source: PubMed Central journal article supplement (PMC1473029)

a)

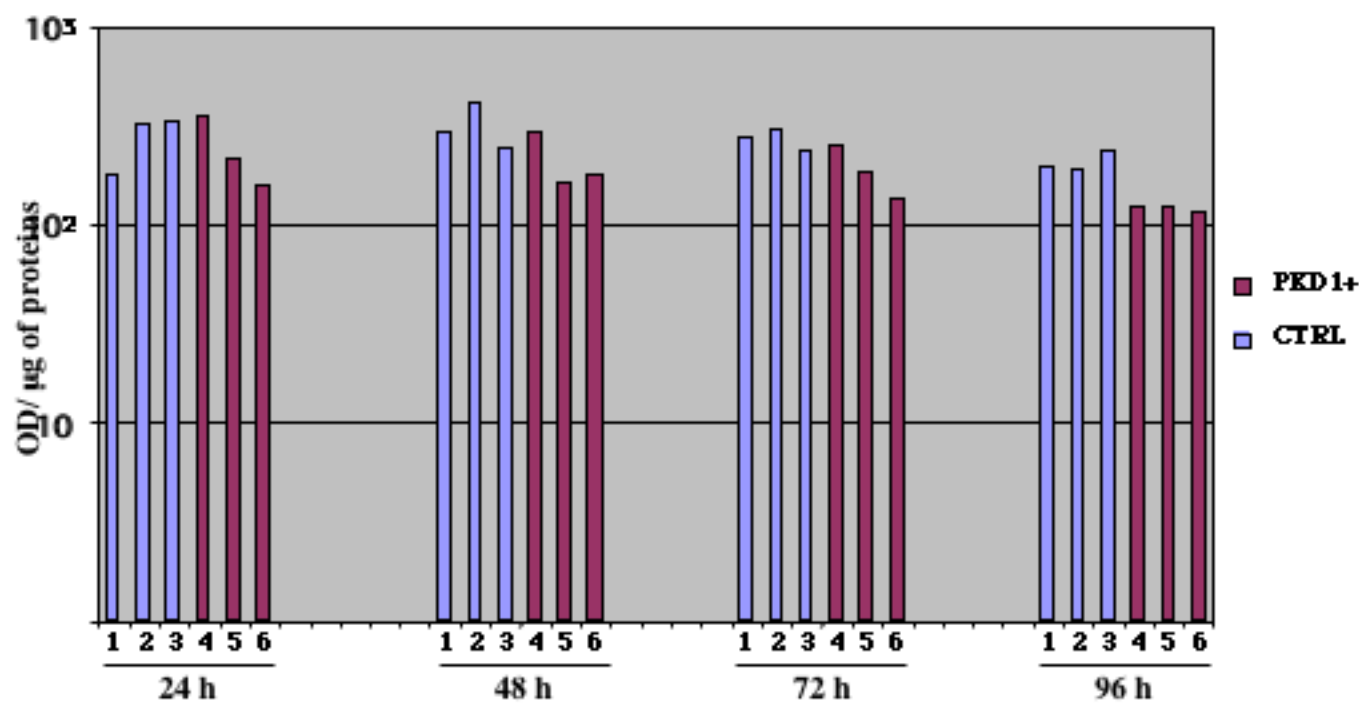

b)

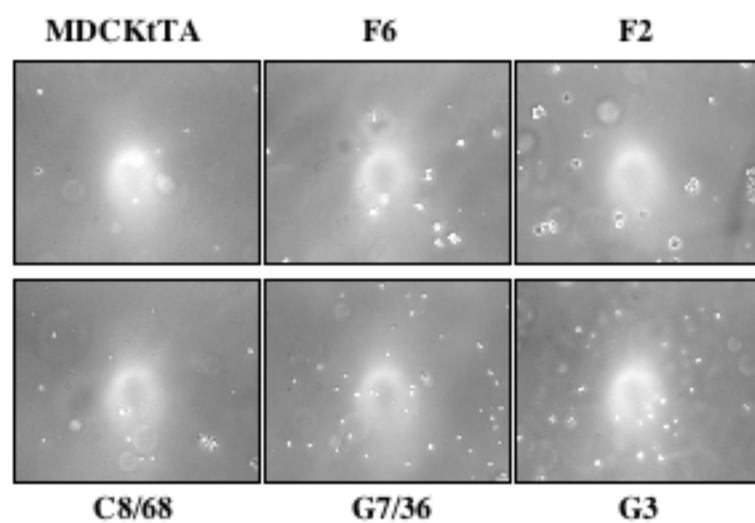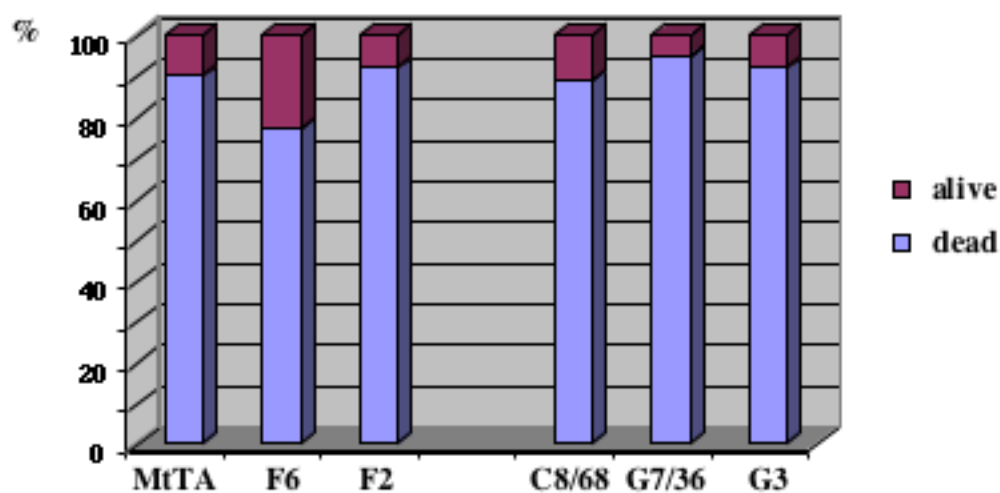

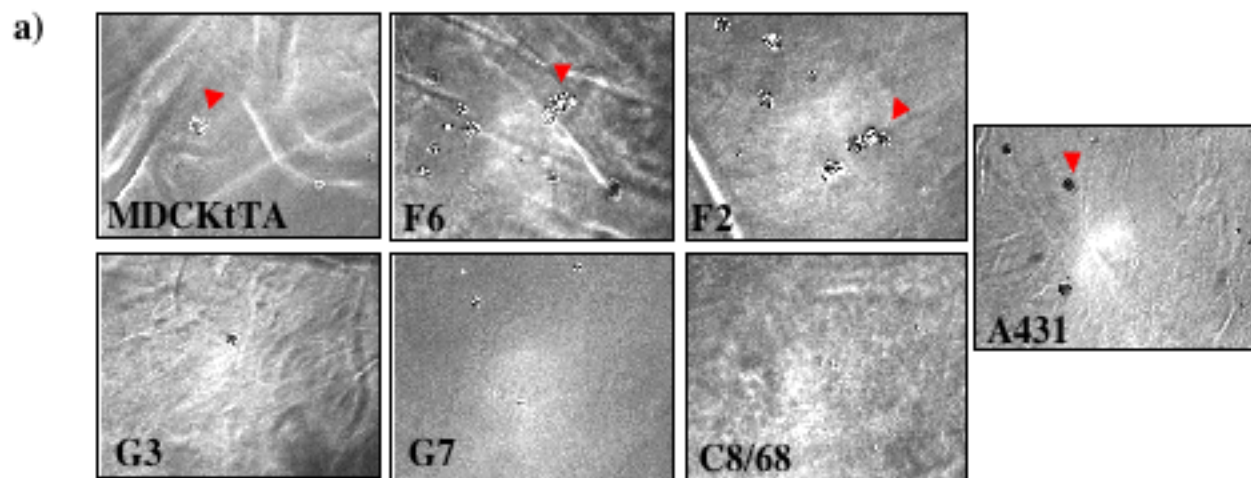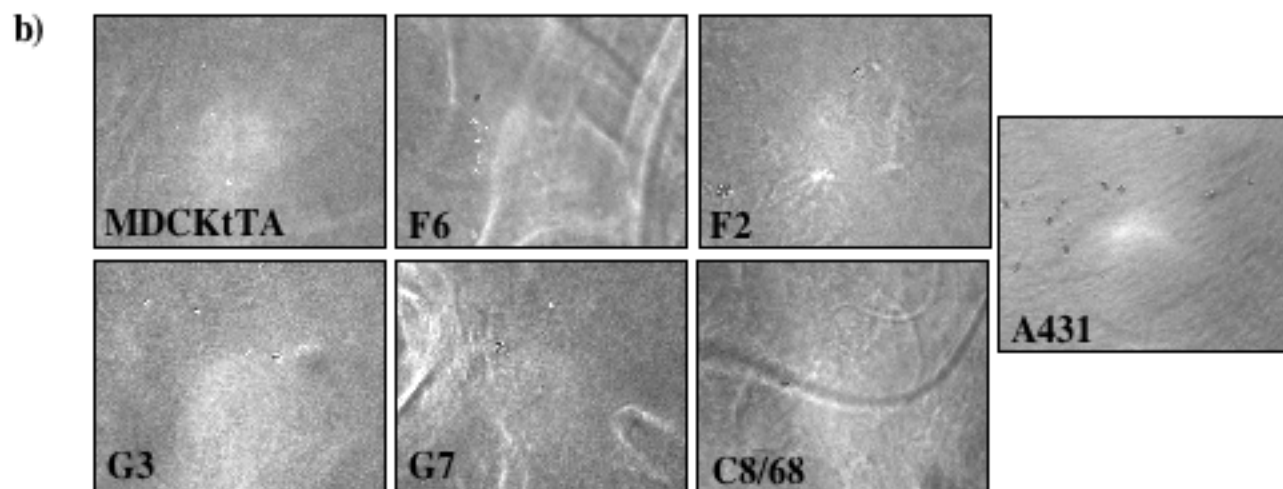

a)

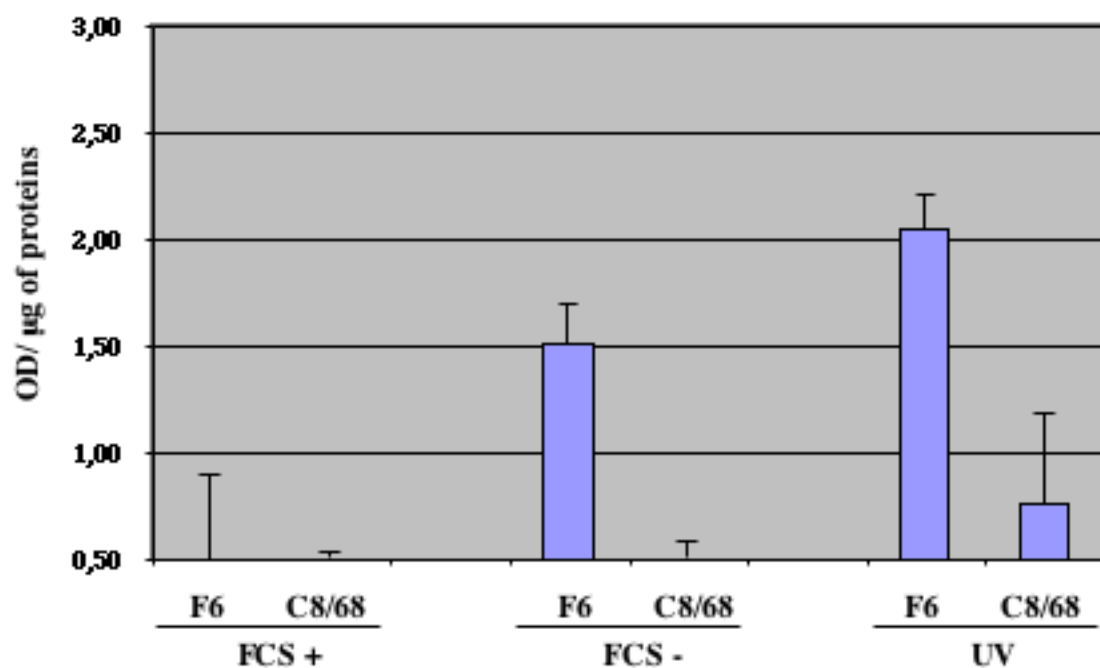

b)

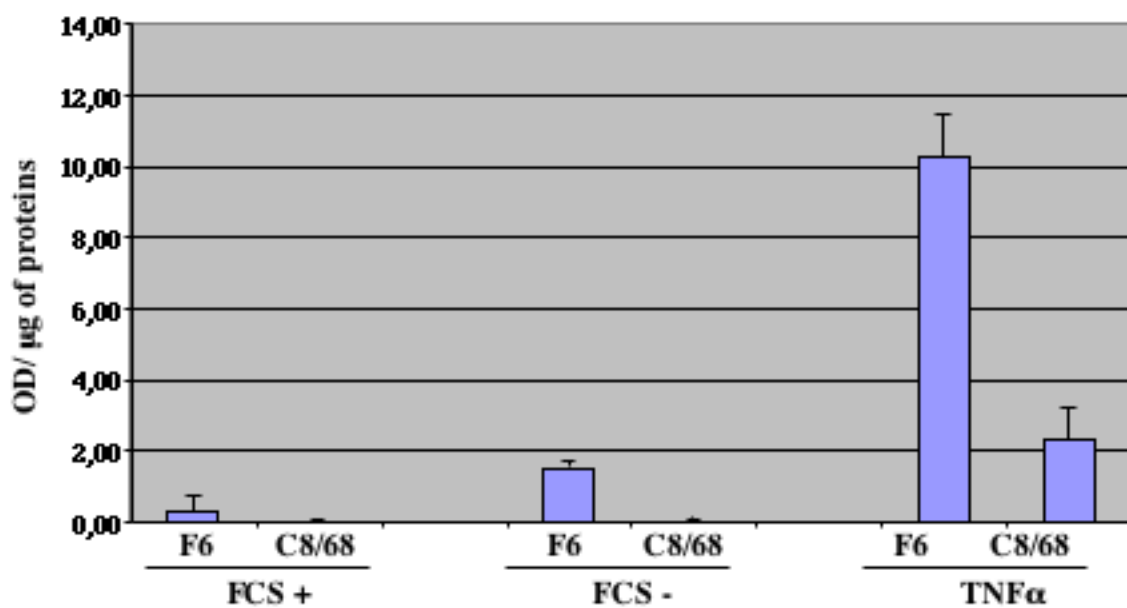

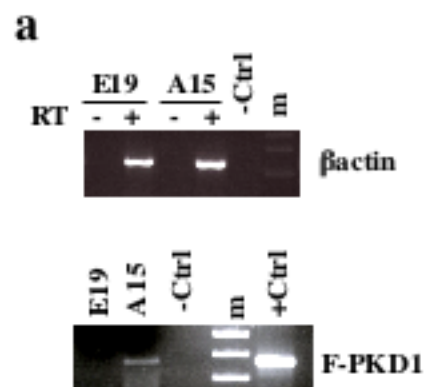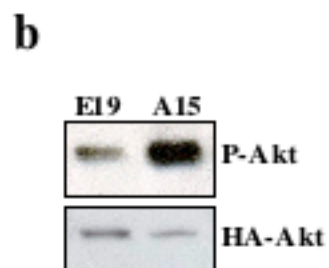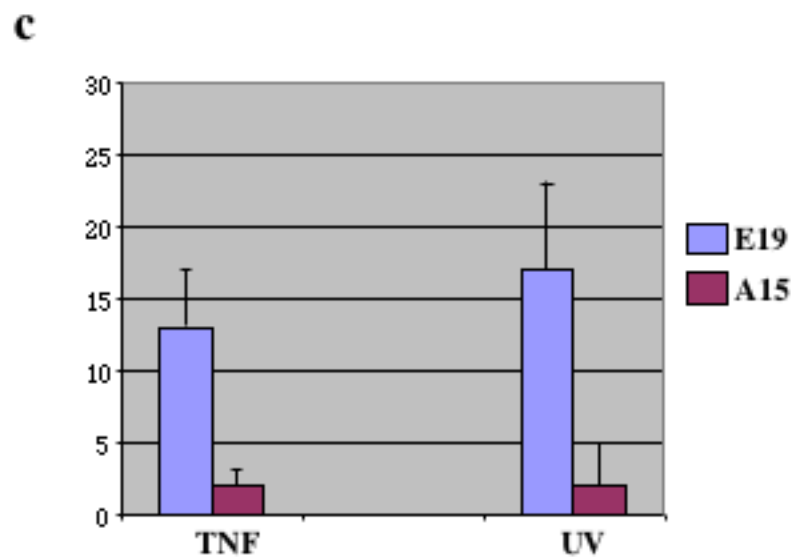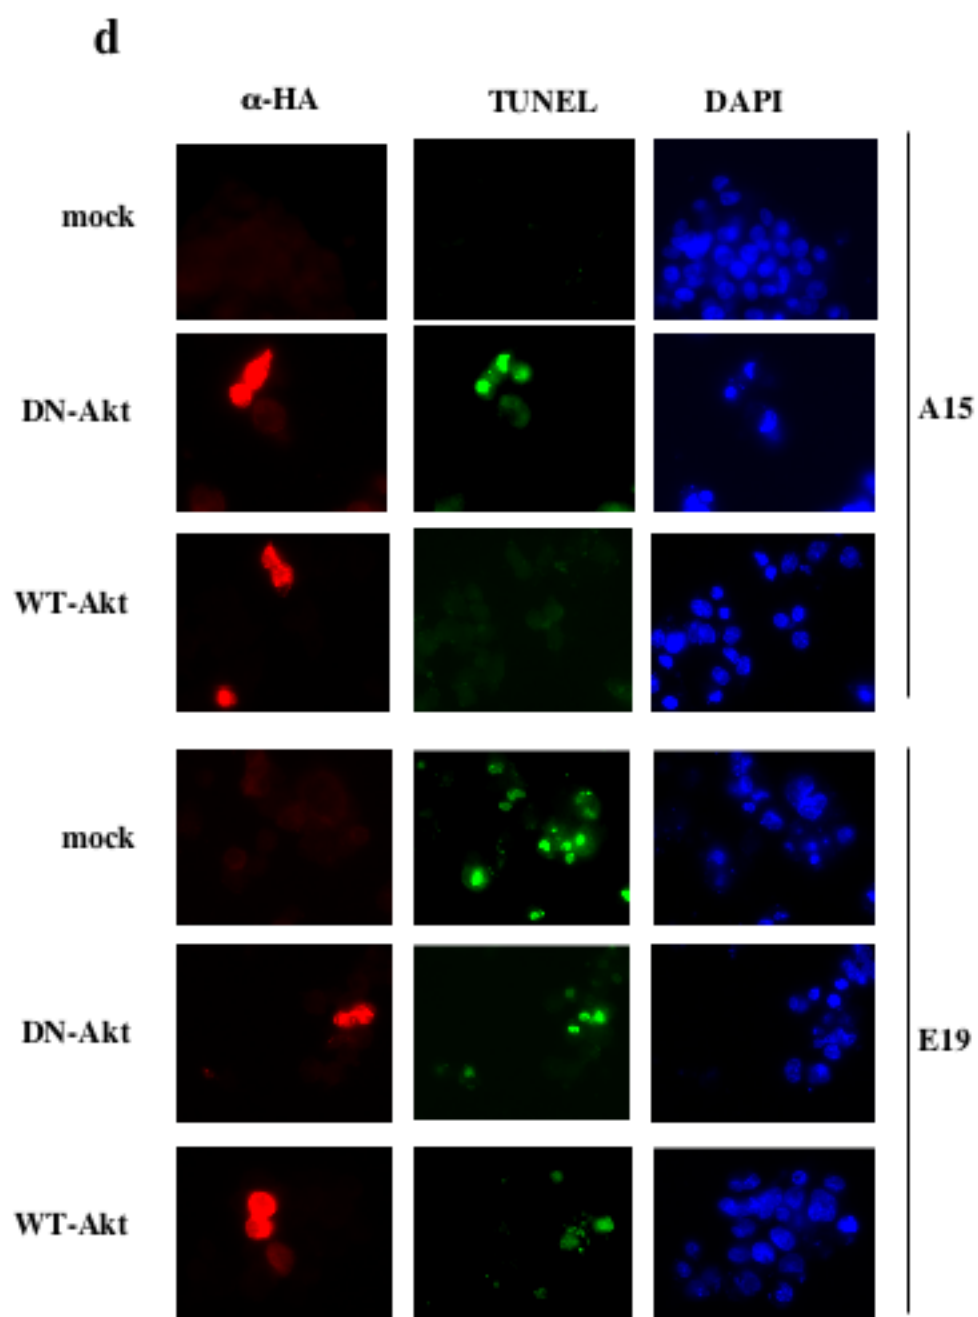

Supplement: NIHMS10163-supplement-suppfigs.pdf [file NIHMS10163-supplement-suppfigs.pdf]
